# Supplementary material for: Interstitial Photodynamic Therapy Using 5-ALA for Malignant Glioma Recurrences
Source: MDPI journal article supplement (doi:10.3390/cancers13081767), 2021-04-07
Supplement: s1 [file s1]

Supplementary Material

# Interstitial Photodynamic Therapy using 5-ALA for Malignant Glioma Recurrences

Stefanie Lietke, Michael Schmutzer, Christoph Schwartz, Jonathan Weller, Sebastian Siller, Maximilian Aumiller, Christian Heckl, Robert Forbrig, Maximilian Niyazi, Rupert Egensperger, Herbert Stepp, Ronald Sroka, Jörg C. Tonn, Adrian Rühm and Niklas Thon

**Supplementary Table S1.** Prognostic factors for TTF after iPDT in uni- and multivariate models HR - Hazard ratio, CI – confidence interval.

| Characteristic                         | Univariate |            |         | Multivariate |            |         |
|----------------------------------------|------------|------------|---------|--------------|------------|---------|
|                                        | HR         | 95% CI     | P-value | HR           | 95% CI     | P-value |
| Time to treatment failure (after iPDT) |            |            |         |              |            |         |
| Age at iPDT                            | 1.001      | .977-1.026 | .910    | 1.035        | .978-1.094 | .236    |
| KPS at iPDT                            | .973       | .940-1.007 | .121    | .970         | .925-1.018 | .222    |
| MGMT methylation                       | .856       | .446-1.641 | .639    | 1.221        | .386-3.860 | .734    |
| IDH mutation                           | .849       | .393-1.835 | .677    | 1.244        | .380-4.076 | .718    |
| Target volume                          | 1.000      | .934-1.071 | .998    | 1.001        | .926-1.083 | .974    |
| Time to iPDT                           | 1.006      | .999-1.013 | .118    | 1.005        | .995-1.016 | .328    |
| Further Chemotherapy                   | 1.366      | .708-2.638 | .352    | 1.023        | .439-2.387 | .958    |
| Further Radiotherapy                   | .999       | .536-1.860 | .997    | .662         | .205-2.137 | .490    |
| Further Surgery                        | 1.131      | .400-3.196 | .817    | 1.724        | .374-7.950 | .485    |

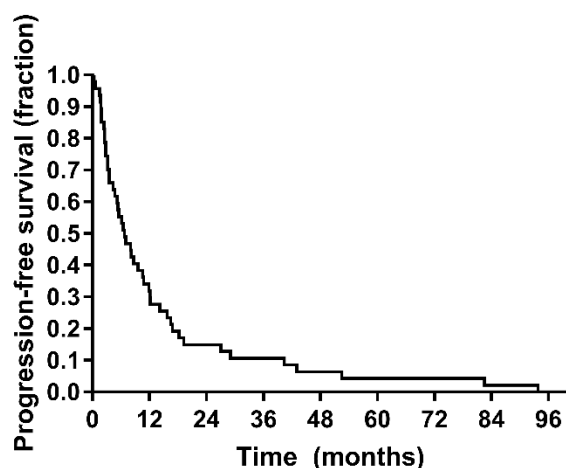

(a)

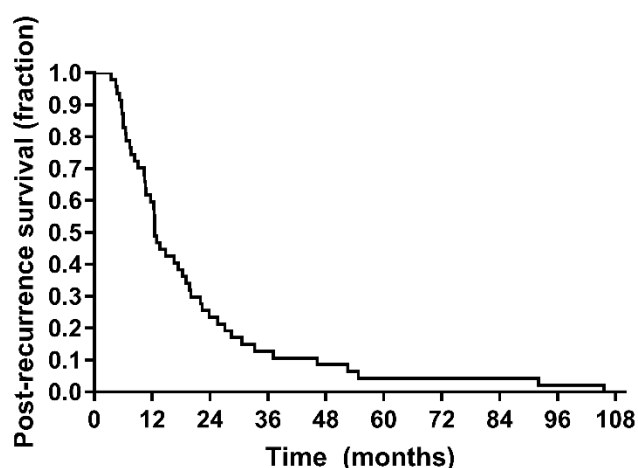

(b)

**Supplementary figure S1.** Survival curves. (a) Time-to-treatment failure (TTF) of the intention to treat population after iPDT treatment; (b) post-recurrence survival (PRS) of the intention to treat population after iPDT treatment.
